# Supplementary material for: The Biomechanical Characterization of the Turning Phase during a 180° Change of Direction
Source: MDPI journal article supplement (doi:10.3390/ijerph18115519), 2021-05-21
Supplement: s1 [file s1]

**Table S1.** Intraclass correlation coefficients (ICC) with the 95% confidence intervals (CI) for the investigated variables.

|                           | PFC                 | FFC                 | AFC                 |
|---------------------------|---------------------|---------------------|---------------------|
|                           | ICC (95% CI)        | ICC (95% CI)        | ICC (95% CI)        |
| Contact time              | 0.882 (0.833-0.920) | 0.814 (0.732-0.876) | 0.854 (0.810-0.890) |
| Braking vertical GRF      | 0.967 (0.953-0.978) | 0.931 (0.901-0.953) | 0.936 (0.894-0.963) |
| Propulsive vertical GRF   | N/A                 | 0.976 (0.966-0.983) | 0.956 (0.938-0.970) |
| Braking horizontal GRF    | 0.975 (0.964-0.983) | 0.962 (0.946-0.974) | 0.962 (0.936-0.978) |
| Propulsive horizontal GRF | N/A                 | 0.939 (0.913-0.958) | 0.969 (0.956-0.979) |
| Total vertical impulse    | 0.976 (0.966-0.983) | 0.954 (0.935-0.969) | 0.935 (0.906-0.957) |
| Total horizontal impulse  | 0.975 (0.965-0.983) | 0.978 (0.969-0.985) | 0.947 (0.924-0.965) |
| Step length               | 0.942 (0.913-0.962) | 0.845 (0.770-0.899) | 0.816 (0.726-0.880) |
| Sprint time               |                     | 0.910 (0.869-0.941) |                     |
| Approach velocity         |                     | 0.909 (0.862-0.944) |                     |

Note: AFC = first accelerating foot contact; FFC = final foot contact; GRF = ground reaction force; N/A = not available; PFC = penultimate foot contact.
