# Supplementary material for: The Biomechanical Characterization of the Turning Phase during a 180° Change of Direction
Source: MDPI journal article supplement (doi:10.3390/ijerph18115519), 2021-05-21
Supplement: s1 [file s1]

**Table S2.** Comparisons of spatial/temporal and kinetic variables during the turning phase between stance and kicking leg (mean±SD).

| Variables                              | Braking/propulsive trials |             |               | Only-propulsive trials |             |               |
|----------------------------------------|---------------------------|-------------|---------------|------------------------|-------------|---------------|
|                                        | Stance leg                | Kicking leg | p (ES)        | Stance leg             | Kicking leg | p (ES)        |
| <b>Penultimate foot contact</b>        |                           |             |               |                        |             |               |
| Total CT (s)                           | 0.392±0.087               | 0.379±0.092 | 0.092 (0.15)  | 0.400±0.123            | 0.382±0.131 | 0.229 (0.14)  |
| Braking VGRF (N/kg)                    | 27.1±7.9                  | 25.6±7.5    | 0.182 (0.19)  | 29.2±6.7               | 27.3±7.5    | 0.228 (0.27)  |
| Braking HGRF (N/kg)                    | 14.9±4.5                  | 14.5±3.9    | 0.452 (0.09)  | 16.5±4.7               | 15.0±4.0    | 0.257 (0.34)  |
| Braking VImp (N·s/kg)                  | 2.3±0.4                   | 2.3±0.4     | 0.347 (0.13)  | 2.5±0.5                | 2.3±0.4     | 0.142 (0.44)  |
| Braking HImp (N·s/kg)                  | 1.4±0.2                   | 1.4±0.2     | 0.187 (0.12)  | 1.4±0.2                | 1.3±0.2     | 0.086 (0.50)  |
| Braking resultant GRF (N/kg)           | 30.7±8.5                  | 29.4±8.5    | 0.303 (0.15)  | 33.0±7.6               | 30.9±8.3    | 0.226 (0.26)  |
| Step length (cm)                       | 121.6±34.9                | 114.9±32.9  | 0.085 (0.20)  | 115.3±33.9             | 109.9±31.9  | 0.185 (0.16)  |
| <b>Final foot contact</b>              |                           |             |               |                        |             |               |
| Braking CT (s)                         | 0.233±0.034               | 0.220±0.041 | 0.093 (0.35)  | 0.237±0.055            | 0.221±0.032 | 0.141 (0.36)  |
| Propulsive CT (s)                      | 0.308±0.047               | 0.308±0.052 | 0.964 (0.01)  | 0.302±0.076            | 0.300±0.068 | 0.920 (0.03)  |
| Total CT (s)                           | 0.541±0.056               | 0.527±0.055 | 0.088 (0.25)  | 0.539±0.086            | 0.527±0.078 | 0.421 (0.15)  |
| Braking VGRF (N/kg)                    | 20.7±3.4                  | 20.9±3.6    | 0.709 (-0.06) | 21.6±5.3               | 22.2±4.5    | 0.481 (-0.12) |
| Propulsive VGRF (N/kg)                 | 14.0±1.1                  | 14.2±1.3    | 0.229 (-0.17) | 14.8±1.2               | 15.0±1.0    | 0.490 (-0.18) |
| Braking HGRF (N/kg)                    | 16.2±2.4                  | 16.2±2.5    | 0.976 (0.01)  | 16.8±2.5               | 17.0±2.5    | 0.701 (-0.08) |
| Propulsive HGRF (N/kg)                 | 10.7±1.4                  | 11.1±1.5    | 0.130 (-0.28) | 10.7±1.2               | 11.2±1.4    | 0.064 (-0.38) |
| Braking VImp (N·s/kg)                  | 2.8±0.4                   | 2.6±0.5     | 0.196 (0.44)  | 2.8±0.6                | 2.8±0.4     | 0.791 (0.07)  |
| Propulsive VImp (N·s/kg)               | 3.0±5.4                   | 3.1±0.5     | 0.317 (-0.03) | 3.2±0.7                | 3.2±0.6     | 0.980 (0.01)  |
| Total VImp (N·s/kg)                    | 5.8±0.5                   | 5.7±0.6     | 0.774 (0.18)  | 6.0±0.6                | 6.0±0.6     | 0.786 (0.06)  |
| Braking HImp (N·s/kg)                  | 2.2±0.3                   | 2.2±0.4     | 0.344 (0.16)  | 2.4±0.5                | 2.4±0.4     | 0.630 (0.14)  |
| Propulsive HImp (N·s/kg)               | 2.2±0.3                   | 2.3±0.3     | 0.181 (-0.33) | 2.2±0.4                | 2.3±0.4     | 0.268 (-0.25) |
| Total HImp (N·s/kg)                    | 4.5±0.4                   | 4.5±0.5     | 0.559 (-0.06) | 4.6±0.5                | 4.7±0.3     | 0.401 (-0.24) |
| Braking resultant GRF (N/kg)           | 26.0±3.9                  | 26.2±4.1    | 0.790 (-0.05) | 26.9±5.5               | 27.4±4.8    | 0.545 (-0.10) |
| Propulsive resultant GRF (N/kg)        | 17.5±1.5                  | 17.9±1.8    | 0.194 (-0.24) | 19.7±5.3               | 18.8±1.5    | 0.505 (0.23)  |
| Step length (cm)                       | 92.3±11.1                 | 91.3±11.6   | 0.642 (0.09)  | 90.7±11.3              | 91.6±13.0   | 0.718 (-0.07) |
| <b>First accelerating foot contact</b> |                           |             |               |                        |             |               |
| Braking CT (s)                         | 0.085±0.023               | 0.092±0.037 | 0.061 (-0.23) | N/A                    | N/A         | N/A           |
| Propulsive CT (s)                      | 0.226±0.055               | 0.220±0.043 | 0.394 (0.12)  | N/A                    | N/A         | N/A           |
| Total CT (s)                           | 0.307±0.061               | 0.313±0.062 | 0.572 (-0.10) | 0.294±0.060            | 0.302±0.060 | 0.346 (-0.13) |
| Braking VGRF (N/kg)                    | 9.1±3.1                   | 8.7±2.6     | 0.227 (0.14)  | N/A                    | N/A         | N/A           |
| Propulsive VGRF (N/kg)                 | 15.8±1.9                  | 15.8±1.9    | 0.951 (-0.01) | 17.0±2.0               | 16.7±1.8    | 0.423 (0.16)  |
| Braking HGRF (N/kg)                    | 4.8±1.5                   | 4.5±1.5     | 0.072 (0.20)  | N/A                    | N/A         | N/A           |
| Propulsive HGRF (N/kg)                 | 8.7±1.5                   | 8.7±1.4     | 0.804 (-0.03) | 9.3±1.4                | 9.1±1.2     | 0.297 (0.15)  |
| Braking VImp (N·s/kg)                  | 0.5±0.2                   | 0.5±0.2     | 0.746 (-0.06) | N/A                    | N/A         | N/A           |
| Propulsive VImp (N·s/kg)               | 2.3±0.4                   | 2.2±0.4     | 0.377 (0.25)  | N/A                    | N/A         | N/A           |
| Total VImp (N·s/kg)                    | 2.8±0.4                   | 2.7±0.3     | 0.364 (0.28)  | 2.6±0.3                | 2.6±0.3     | 0.743 (0.09)  |
| Braking HImp (N·s/kg)                  | 0.2±0.1                   | 0.2±0.1     | 0.695 (0.07)  | N/A                    | N/A         | N/A           |
| Propulsive HImp (N·s/kg)               | 1.2±0.2                   | 1.2±0.2     | 0.489 (0.13)  | N/A                    | N/A         | N/A           |
| Total HImp (N·s/kg)                    | 1.4±0.2                   | 1.4±0.2     | 0.393 (0.14)  | 1.4±0.1                | 1.4±0.2     | 0.878 (0.04)  |
| Braking resultant GRF (N/kg)           | 10.1±3.2                  | 9.6±2.8     | 0.172 (0.17)  | N/A                    | N/A         | N/A           |
| Propulsive resultant GRF (N/kg)        | 18.0±2.3                  | 18.0±2.2    | 0.916 (0.15)  | 19.3±2.2               | 18.9±2.0    | 0.402 (0.19)  |
| Step length (cm)                       | 82.0±9.6                  | 83.8±10.6   | 0.329 (-0.18) | 76.3±7.1               | 79.6±9.2    | 0.090 (-0.40) |

Note: AFC = first accelerating foot contact; CT = contact time; FFC = final foot contact; HGRF = horizontal ground reaction force; HImp = horizontal impulse; N/A = not available; PFC = penultimate foot contact; VGRF = vertical ground reaction force; VImp = vertical impulse. Completion time (stance leg: 2.76±0.14 s; kicking leg: 2.77±0.14 s; p = 399; ES = -0.07) and approach velocity (stance leg: 5.36±0.53 m/s; kicking leg: 5.43±0.40 m/s; p = 0.253; ES = -0.15).
