# Supplementary figures and images for: The Biomechanical Characterization of the Turning Phase during a 180° Change of Direction
Source: MDPI journal article supplement (doi:10.3390/ijerph18115519), 2021-05-21

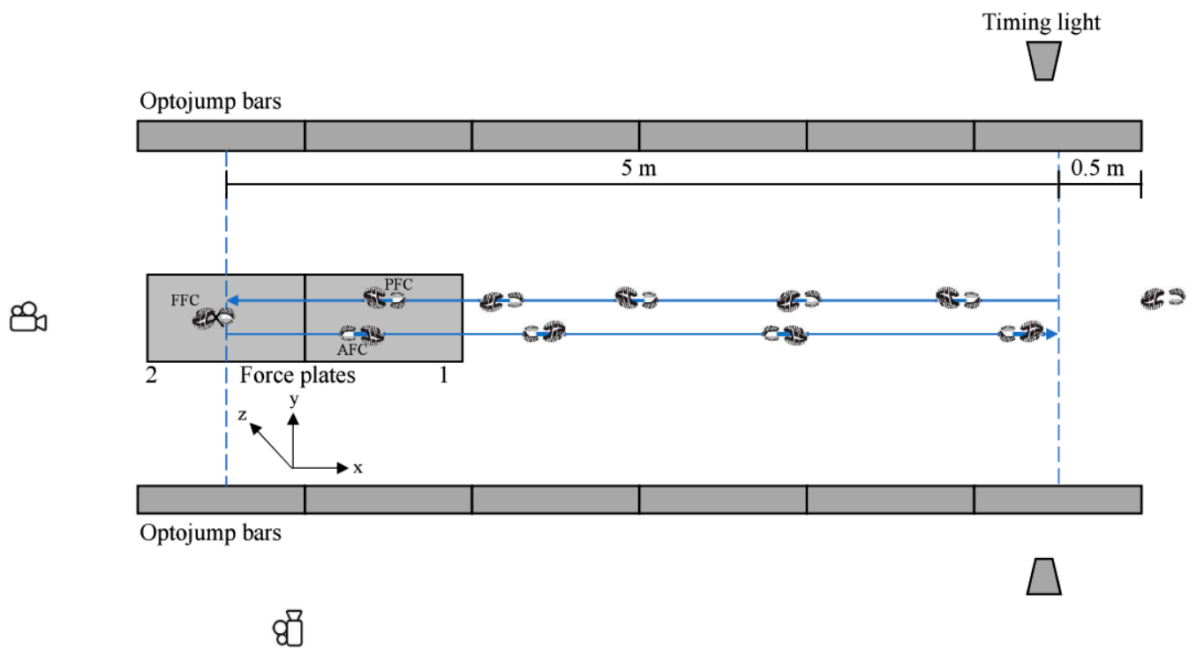

**Figure S1.** Graphical representation of the laboratory setting.

Supplement: s1 [file s1]
